# Supplementary material for: Gut Microbial Metabolite Pravastatin Attenuates Intestinal Ischemia/Reperfusion Injury Through Promoting IL-13 Release From Type II Innate Lymphoid Cells via IL−33/ST2 Signaling
Source: PubMed Central journal article supplement (PMC8505964; doi:10.3389/fimmu.2021.704836), 2021-09-28

**Figure supplement 1**

**A**

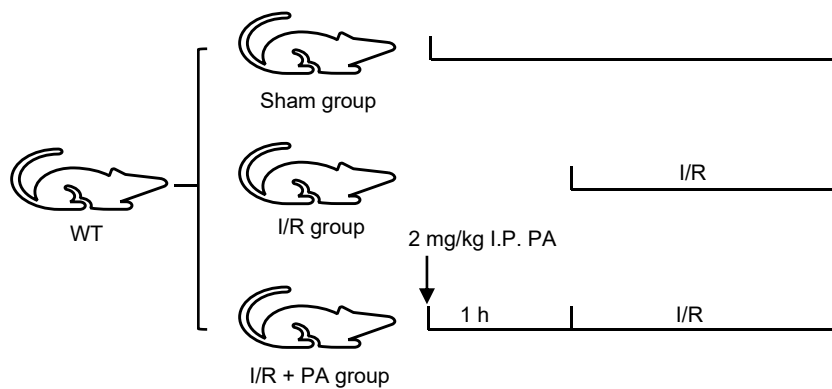

**B**

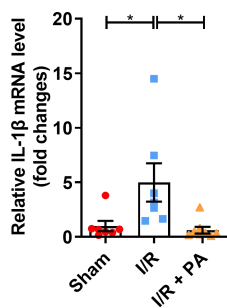

**C**

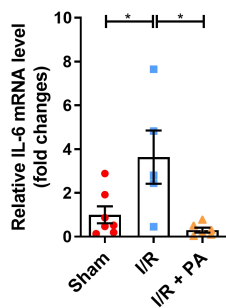

**D**

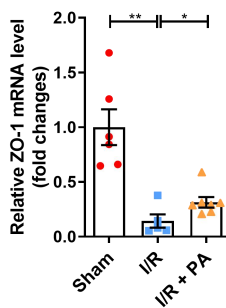

**E**

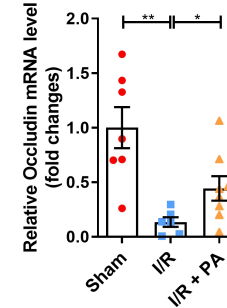

**F**

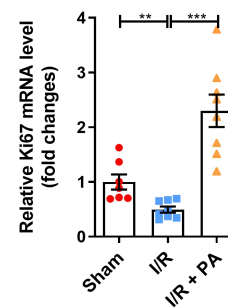

**G**

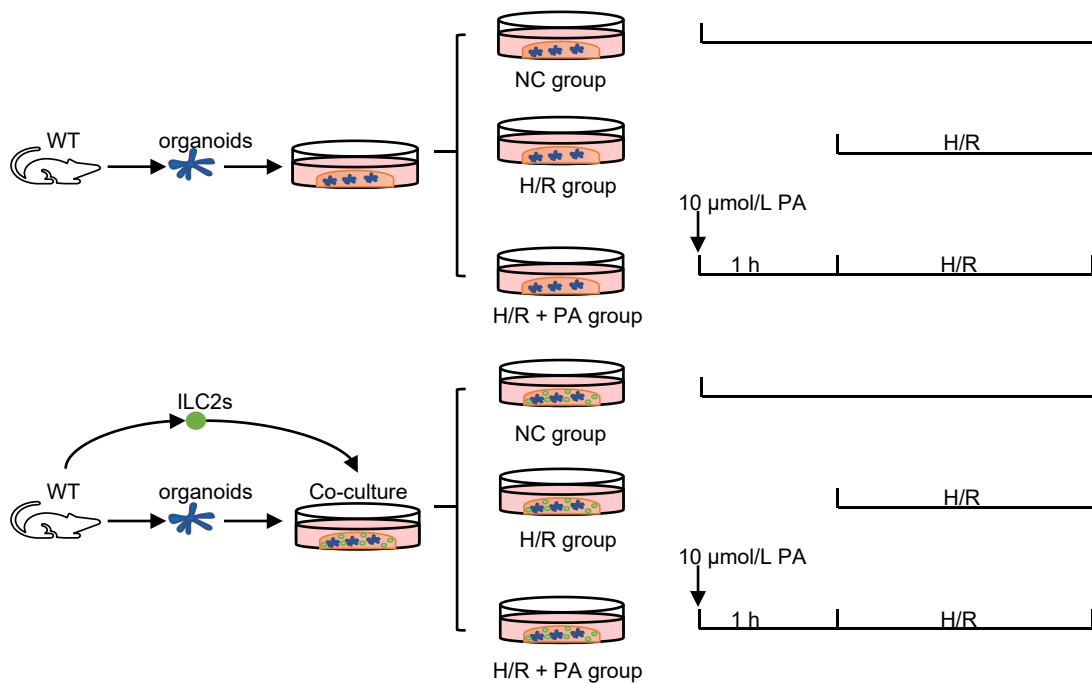

**H**

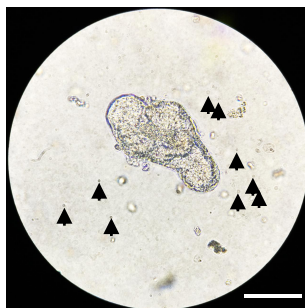

**I**

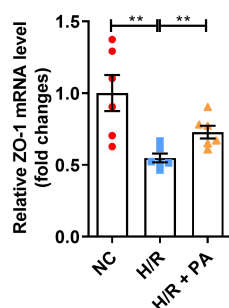

**J**

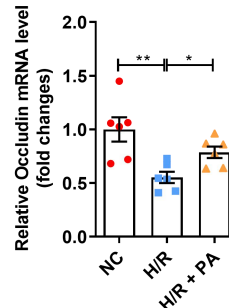

**K**

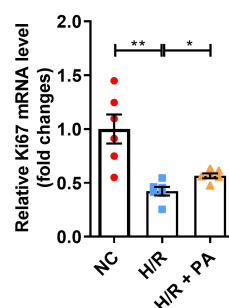

Supplement: DataSheet_2.pdf [file DataSheet_2.pdf]
