# Supplementary material for: Gut Microbial Metabolite Pravastatin Attenuates Intestinal Ischemia/Reperfusion Injury Through Promoting IL-13 Release From Type II Innate Lymphoid Cells via IL−33/ST2 Signaling
Source: PubMed Central journal article supplement (PMC8505964; doi:10.3389/fimmu.2021.704836), 2021-09-28

**Figure supplement 4**

**A**

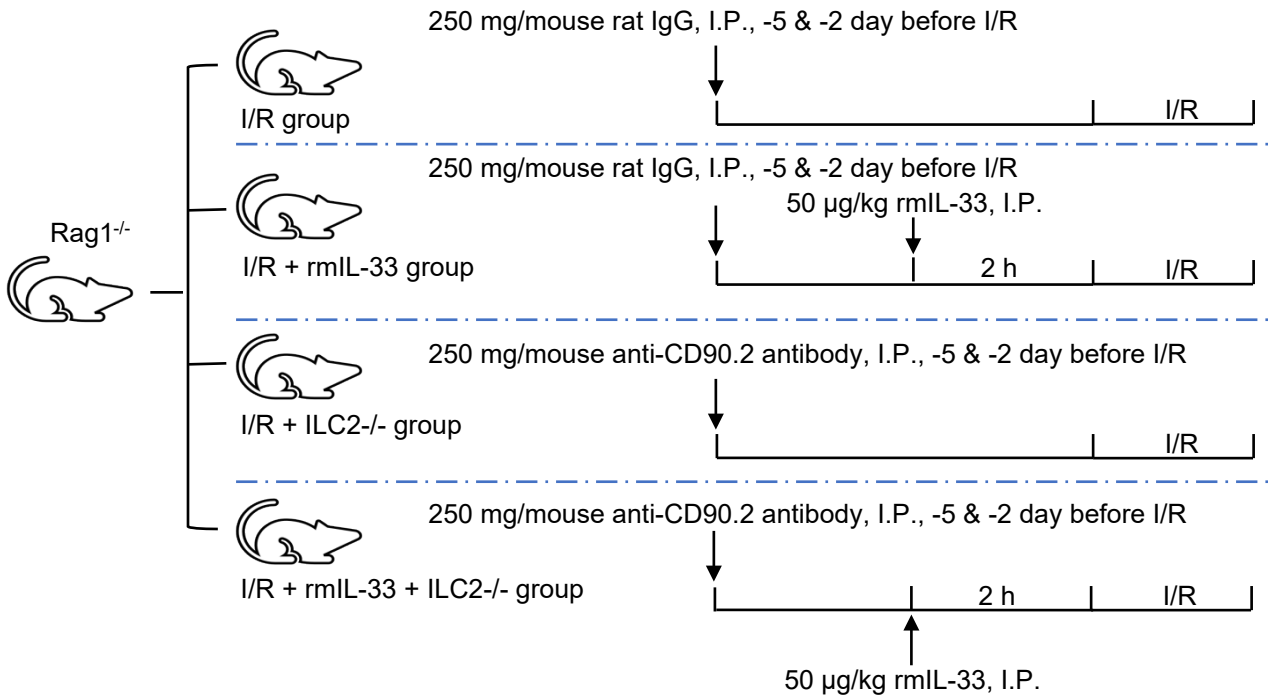

**B**

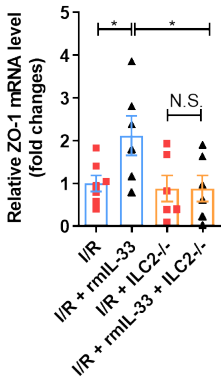

**C**

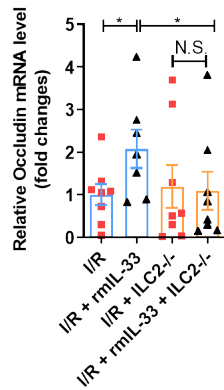

**D**

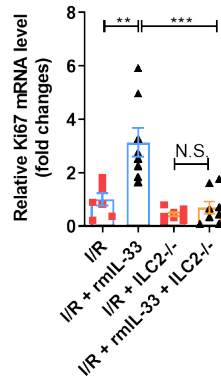

**E**

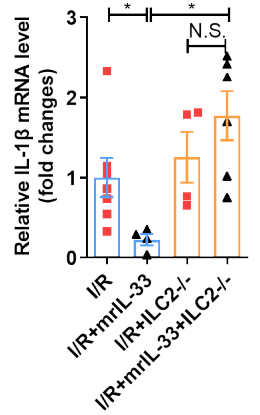

**F**

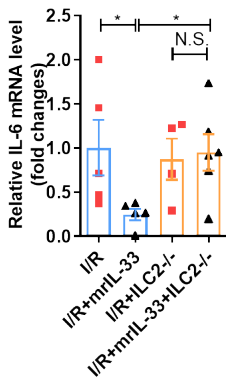

Supplement: DataSheet_5.pdf [file DataSheet_5.pdf]
