# Supplementary material for: Gut Microbial Metabolite Pravastatin Attenuates Intestinal Ischemia/Reperfusion Injury Through Promoting IL-13 Release From Type II Innate Lymphoid Cells via IL−33/ST2 Signaling
Source: PubMed Central journal article supplement (PMC8505964; doi:10.3389/fimmu.2021.704836), 2021-09-28

Figure supplement 5

A

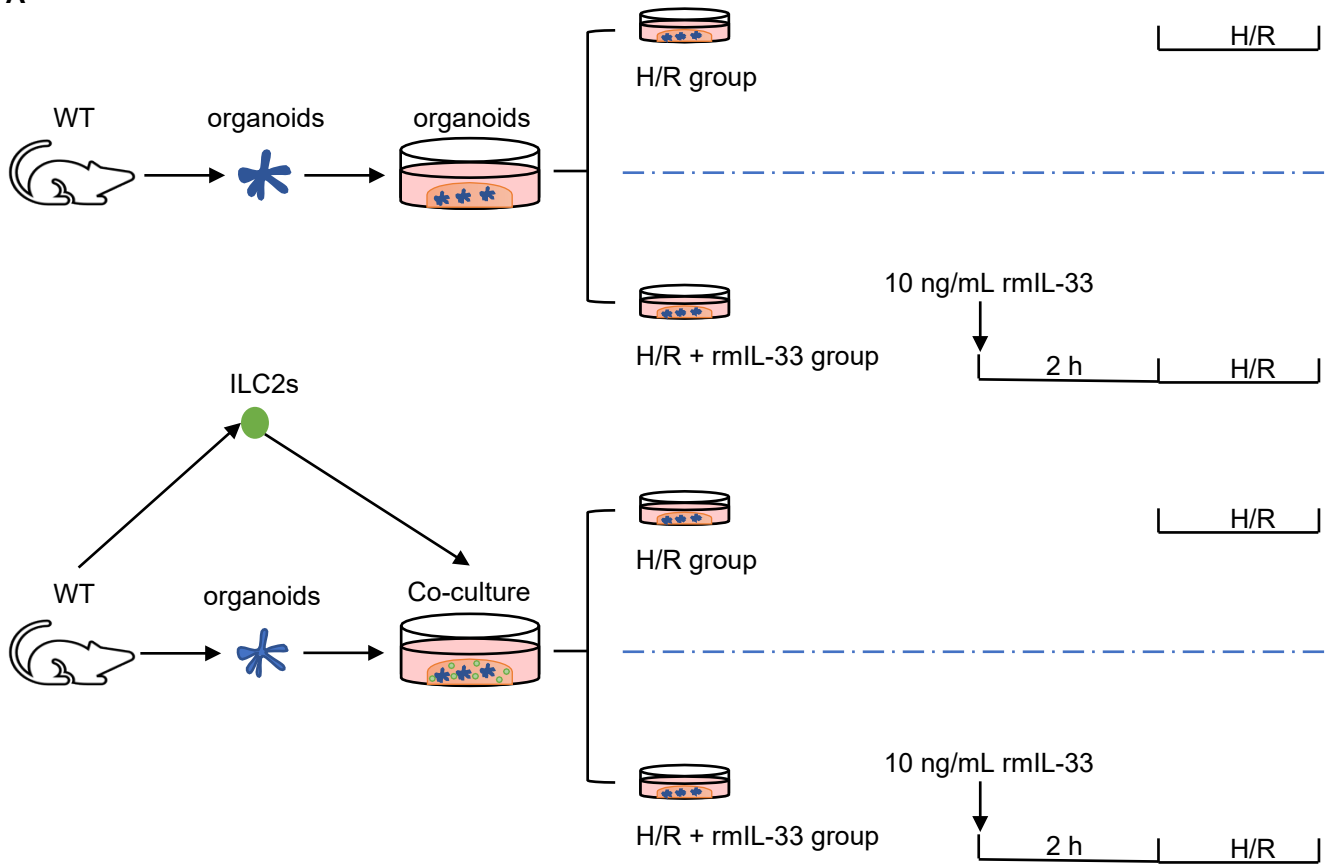

B

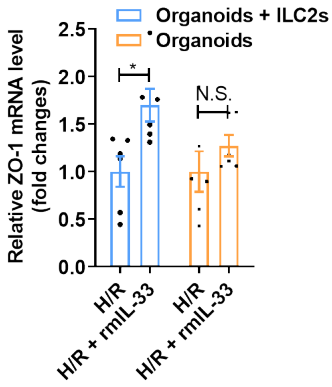

C

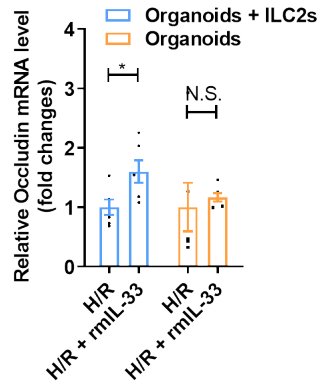

D

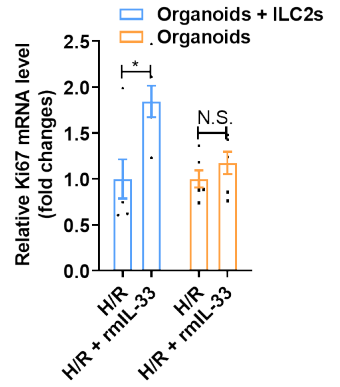

Supplement: DataSheet_6.pdf [file DataSheet_6.pdf]
