# Supplementary material for: Gut Microbial Metabolite Pravastatin Attenuates Intestinal Ischemia/Reperfusion Injury Through Promoting IL-13 Release From Type II Innate Lymphoid Cells via IL−33/ST2 Signaling
Source: Front Immunol. 2021 Sep 28;12:704836. doi: 10.3389/fimmu.2021.704836 (PMC8505964; doi:10.3389/fimmu.2021.704836)
Supplement: Supplementary file 1 [file DataSheet_1.pdf]

**Supplemental**

**Supplemental Table 1**

**Supplementary figure legends**

**Supplementary Table 1 Primers sequence of RT-PCR.**

| Gene     | Forward primer (5'–3')   | Reverse primer (5'–3') |
|----------|--------------------------|------------------------|
| 18S      | CGATCCGAGGGCCTCACTA      | AGTCCCTGCCCTTTGTACACA  |
| ZO-1     | AGAGACAAGATGTCCGCCAG     | TGCAATTCCAAATCCAAACC   |
| Occludin | CATTTATGATGAACAGCCCC     | GGACTGTCAACTCTTTCCGC   |
| Ki67     | ATCATTGACCGCTCCTTTAGGT   | GCTCGCCTTGATGGTTCCT    |
| Lgr5     | CCTACTCGAAGACTTACCCAGT   | GCATTGGGGTGAATGATAGCA  |
| IL-33    | ATTTCCCCGGCAAAGTTCAG     | AACGGAGTCTCATGCAGTAGA  |
| ST2      | GAAGGCACACCGTAAGACTA     | GACAAACCAACGATAGGAGG   |
| IL-13    | TGAGCAACATCACACAAGACC    | GGCCTTGCGGTTACAGAGG    |
| Notch1   | GATGGCCTCAATGGGTACAAG    | TCGTTGTTGTTGATGTCACAGT |
| Hes1     | TCAACACGACACCGGACAAAC    | ATGCCGGGAGCTATCTTTCTT  |
| Jagged1  | CCTCGGGTCAGTTTGAGCTG     | CCTTGAGGCACACTTTGAAGTA |
| Dll1     | GCAGGACCTTCTTTCGCGTAT    | AAGGGGAATCGGATGGGGTT   |
| Dll4     | TTCCAGGCAACCTTCTCCGA     | ACTGCCGCTATTCTTGTCCC   |
| Wnt3     | TGGAAGTGTACCACCATAGATGAC | ACACCAGCCGAGGCGATG     |
| Axin2    | GGACTGGGGAGCCTAAAGGT     | AAGGAGGGACTCCATCTACGC  |
| C-myc    | TTCATCTGCGATCCTGACGAC    | CACTGAGGGGTCAATGCACTC  |
| Lrp5     | AAGGGTGCTGTGTACTGGAC     | AGAAGAGAACCTTACGGGACG  |
| Lrp6     | TTGTTGCTTTATGCAAACAGACG  | GTTCGTTTAATGGCTTCTTCGC |
| Dkk1     | CAGTGCCACCTTGAACCTCAGT   | CCGCCCTCATAGAGAACTCC   |

## Supplementary figure legends

### Supplementary figure S1 PA ameliorated mouse intestinal I/R injury and organoids H/R injury.

(A) Experimental design in vivo. The mice were randomly divided into the following groups. (1) Group sham operation group (sham group); (2) I/R group, in which SMA was occluded for 60 min followed by 2 h reperfusion; (3) I/R + PA group that was injected i.p. with 2 mg/kg PA 1 h before inducing intestinal I/R. (B-F) The relative mRNA levels of *IL-1 $\beta$* , *IL-6*, *ZO-1*, *Occludin* and *Ki67* in the ileum were measured by quantitative PCR (n=8). (G) Experimental design in vitro. The WT monocultured organoids and the co-cultured organoid and ILC2 group were randomly assigned to a normal control (NC that was manipulated in the same manner as the H/R group but without undergoing H/R surgery); H/R group; H/R+PA group in which the organoids were incubated with 10  $\mu$ mol/L PA 1 h before H/R. (H) The co-culture of small intestine organoids and ILC2 was observed under light microscope, scale bar is 50  $\mu$ m, the black arrow indicates ILC2. (I-K) The relative mRNA levels of *ZO-1*, *Occludin* and *Ki67* in the organoids were measured by quantitative PCR (n=6). The results are expressed as the mean  $\pm$  SEM (B-F, H-J). \*  $p < 0.05$ , \*\*  $p < 0.01$ , \*\*\*  $p < 0.001$  by one-way ANOVA (Tukey's test). PA, pravastatin; I/R, ischemia/reperfusion; SMA, superior mesenteric artery; WT, wild type; NC, normal control; H/R, hypoxia/reoxygenation; ILC2, type II innate lymphoid cells.

### Supplementary figure S2 PA protected against intestinal I/R injury via an IL-33/ST2 signal.

(A) Experimental design in vivo. The WT mice were randomly

divided into the following groups. (1) I/R group, in which SMA was occluded for 60 min followed by 2 h reperfusion; (2) I/R + PA group that was injected i.p. with 2 mg/kg PA 1 h before inducing intestinal I/R; (3) I/R + Anti-IL-33 group, in which WT mice were injected i.p. with 60 µg/kg Anti-IL-33 neutralizing antibody 2 h before establishing the intestinal I/R model; (4) I/R + PA + Anti-IL-33 group, in which WT mice were injected i.p. with 60 µg/kg Anti-IL-33 neutralizing antibody 2 h before intestinal I/R and 2 mg/kg PA 1 h before intestinal I/R in mice; (5) I/R + PA + Anti-ST2 group, in which WT mice were injected i.p. with 2 mg/kg PA and 1.5 mg/kg Anti-ST2 neutralizing antibody 1 and 2 h, respectively, before establishing the intestinal I/R model in mice. The IL-33<sup>-/-</sup> mice (IL-33<sup>-/-</sup>) were randomly assigned to I/R and I/R + PA groups. (B-F) The relative mRNA levels of *ZO-1*, *Occludin*, *Ki67*, *IL-1β*, and *IL-6* in the ileum were measured by quantitative PCR (n=8). The results are expressed as the mean ± SEM (B-F). \*  $p < 0.05$ , \*\*  $p < 0.01$ , \*\*\*  $p < 0.001$  by one-way ANOVA (Tukey's test). PA, pravastatin; I/R, ischemia/reperfusion; SMA, superior mesenteric artery; WT, wild type.

**Supplementary figure S3 PA protected organoids H/R injury via an IL-33/ST2**

**signal.** (A) Experimental design in vitro. The cocultured WT organoid and ILC2 group were randomly assigned to (1) H/R group; (2) H/R + PA group; (3) H/R + Anti-IL-33 groups, in which co-culture was incubated with 1 ng/mL Anti-IL-33 neutralizing antibody 2 h before H/R; (4) H/R+PA+Anti-IL-33 group, in which co-culture was incubated with 1 ng/mL Anti-IL-33 neutralizing antibody 2 h before

intestinal I/R and 10  $\mu\text{mol/L}$  PA 1 h before intestinal I/R in mice; (5) I/R+PA+Anti-ST2 group, in which co-culture was incubated with 10  $\mu\text{mol/L}$  PA and 3  $\mu\text{g/mL}$  Anti-ST2 neutralizing antibody 1 and 2 h before H/R, respectively. Meanwhile, co-cultured organoids from IL-33<sup>-/-</sup> mice and ILC2 from WT mice were randomly assigned to H/R and H/R + PA groups. (B-D) The relative mRNA levels of *ZO-1*, *Occludin* and *Ki67* in the organoids were measured by quantitative PCR (n=6). The results are expressed as the mean  $\pm$  SEM (B-D). \*  $p < 0.05$ , \*\*  $p < 0.01$ , \*\*\*  $p < 0.001$  by one-way ANOVA (Tukey's test). PA, pravastatin; H/R, hypoxia/reoxygenation; WT, wild type; ILC2, type II innate lymphoid cells.

**Supplementary figure S4 Depletion of ILC2 abolished the protective effect of IL-33 on intestinal I/R injury and organoids H/R injury.** (A) Experimental design in vivo. The Rag1<sup>-/-</sup> mice were randomly divided into the following groups. (1) I/R group: Rag1<sup>-/-</sup> mice were injected i.p. with control rat IgG2b on days -5 and -2 before I/R; (2) I/R + rmIL-33 group: Rag1<sup>-/-</sup> mice were injected i.p. with control rat IgG2b on days -5 and -2 before I/R, and 50  $\mu\text{g/kg}$  rmIL-33 2 h before intestinal I/R; (3) I/R + ILC2<sup>-/-</sup> group: Rag1<sup>-/-</sup> mice were injected i.p. with anti-CD90.2 antibody on days -5 and -2 before I/R surgery; (4) I/R + rmIL-33 + ILC2<sup>-/-</sup> group: Rag1<sup>-/-</sup> mice were injected i.p. with anti-CD90.2 antibody on days -5 and -2 before I/R surgery and 50  $\mu\text{g/kg}$  rmIL-33, 2 h before I/R. (B-F) The relative mRNA levels of *ZO-1*, *Occludin*, *Ki67*, *IL-1 $\beta$*  and *IL-6* in the ileum were measured by quantitative PCR (n=8). The results are expressed as the mean  $\pm$  SEM (B-F). \*  $p < 0.05$ , \*\*  $p < 0.01$ , \*\*\*  $p < 0.001$

by one-way ANOVA (Tukey's test). PA, pravastatin; I/R, ischemia/reperfusion; WT, wild type; DTx, diphtheria toxin; WT, wild type; ILC2, type II innate lymphoid cells; rm, recombinant murine.

**Supplementary figure S5 Protection of organoids by IL-33 during H/R injury requires ILC2 participation.** (A) Experimental design in vitro. Organoids extracted from WT mice without ILC2 were randomly assigned to (1) H/R group; (2) H/R + rmIL-33 group. Meanwhile, co-culture system of organoids and ILC2 extracted from the WT mice were divided into 2 groups, H/R group and H/R + rmIL-33 group. (B-D) The relative mRNA levels of *ZO-1*, *Occludin* and *Ki67* in the organoids were measured by quantitative PCR (n=6). The results are expressed as the mean  $\pm$  SEM (B-D). \*  $p < 0.05$ , \*\*  $p < 0.01$ , \*\*\*  $p < 0.001$  by one-way ANOVA (Tukey's test). PA, pravastatin; H/R, hypoxia/reoxygenation; WT, wild type; ILC2, type II innate lymphoid cells; rm, recombinant murine.

**Supplementary figure S6 PA/IL-33 protection against intestinal I/R injury was mediated by IL-13.** (A) Experimental design in vivo. The WT mice were randomly divided into the following groups. (1) I/R group; (2) I/R + PA group; (3) I/R + rmIL-33 group; (4) I/R + Anti-IL-13 group that was injected i.p. with 400  $\mu$ g/kg Anti-IL-13 2 h before inducing intestinal I/R; (5) I/R + PA + Anti-IL-13 group; (6) I/R + rmIL-33 + Anti-IL-13 group. (B-F) The relative mRNA levels of *ZO-1*, *Occludin*, *Ki67*, *IL-1 $\beta$*  and *IL-6* in the ileum were measured by quantitative PCR (n=8). The

results are expressed as the mean  $\pm$  SEM (B-F). \*  $p < 0.05$ , \*\*  $p < 0.01$ , \*\*\*  $p < 0.001$  by one-way ANOVA (Tukey's test). PA, pravastatin; I/R, ischemia/reperfusion; WT, wild type; rm, recombinant murine.

**Supplementary figure S7 Protection of organoids during H/R injury by PA/IL-33 was mediated by IL-13 released from ILC2.** (A) Experimental design in vitro. The co-cultured organoids and ILC2 extracted from the WT mice were randomly assigned to the following groups: H/R group, H/R + PA group, H/R + rmIL-33 group, H/R + Anti-IL-13 group, H/R + PA + Anti-IL-13 group and H/R + rmIL-33 + Anti-IL-13 group. (B-D) The relative mRNA levels of *ZO-1*, *Occludin* and *Ki67* in the organoids were measured by quantitative PCR (n=6). The results are expressed as the mean  $\pm$  SEM (B-D). \*  $p < 0.05$ , \*\*  $p < 0.01$ , \*\*\*  $p < 0.001$  by one-way ANOVA (Tukey's test). PA, pravastatin; H/R, hypoxia/reoxygenation; WT, wild type; ILC2, type II innate lymphoid cells; rm, recombinant murine.
